# Supplementary material for: Lignin as a MALDI matrix for small molecules: a proof of concept
Source: Royal Society of Chemistry journal article supplement (doi:10.1039/d1an01632f), 2021-01-01
Supplement: d1an01632f1.pdf [file d1an01632f1.pdf]

## SUPPORTING INFORMATION

### Lignin as a MALDI matrix for small molecules: A proof of concept

Xiaoyong Zhao<sup>a,1</sup>, Huiwen Wang<sup>b,1</sup>, Yilong Liu<sup>a</sup>, Ruohan Ou<sup>a</sup>, Yaqin Liu<sup>b</sup>, Xian

Li<sup>a,\*\*</sup>, Yuanjiang Pan<sup>b,\*</sup>

#### Affiliations:

<sup>a</sup> Zhejiang Provincial Key Laboratory of Horticultural Plant Integrative Biology, Zhejiang University, Hangzhou 310058, China

<sup>b</sup> Department of Chemistry, Zhejiang University, Hangzhou 310027, China

#### \*Corresponding author.

\* Prof Pan Yuanjiang, E-mail: panyuanjiang@zju.edu.cn, Tel.: +86 571 87951629;

Fax: +86 571 87951629;

\*\* Prof Xian Li, Email: xianli@zju.edu.cn; Tel: +86-571-8898-1263; Fax: +86571-8898-2224;

<sup>1</sup> Equal contribution to this work.

## TABLE OF CONTENTS

|            |     |
|------------|-----|
| Cover page | 2   |
| Figure S1  | 3   |
| Figure S2  | 4-5 |

|                      |           |
|----------------------|-----------|
| <b>Figure S3</b>     | <b>6</b>  |
| <b>Figure S4</b>     | <b>7</b>  |
| <b>Table S1</b>      | <b>8</b>  |
| <b>Table S2</b>      | <b>9</b>  |
| <b>Abbreviations</b> | <b>10</b> |

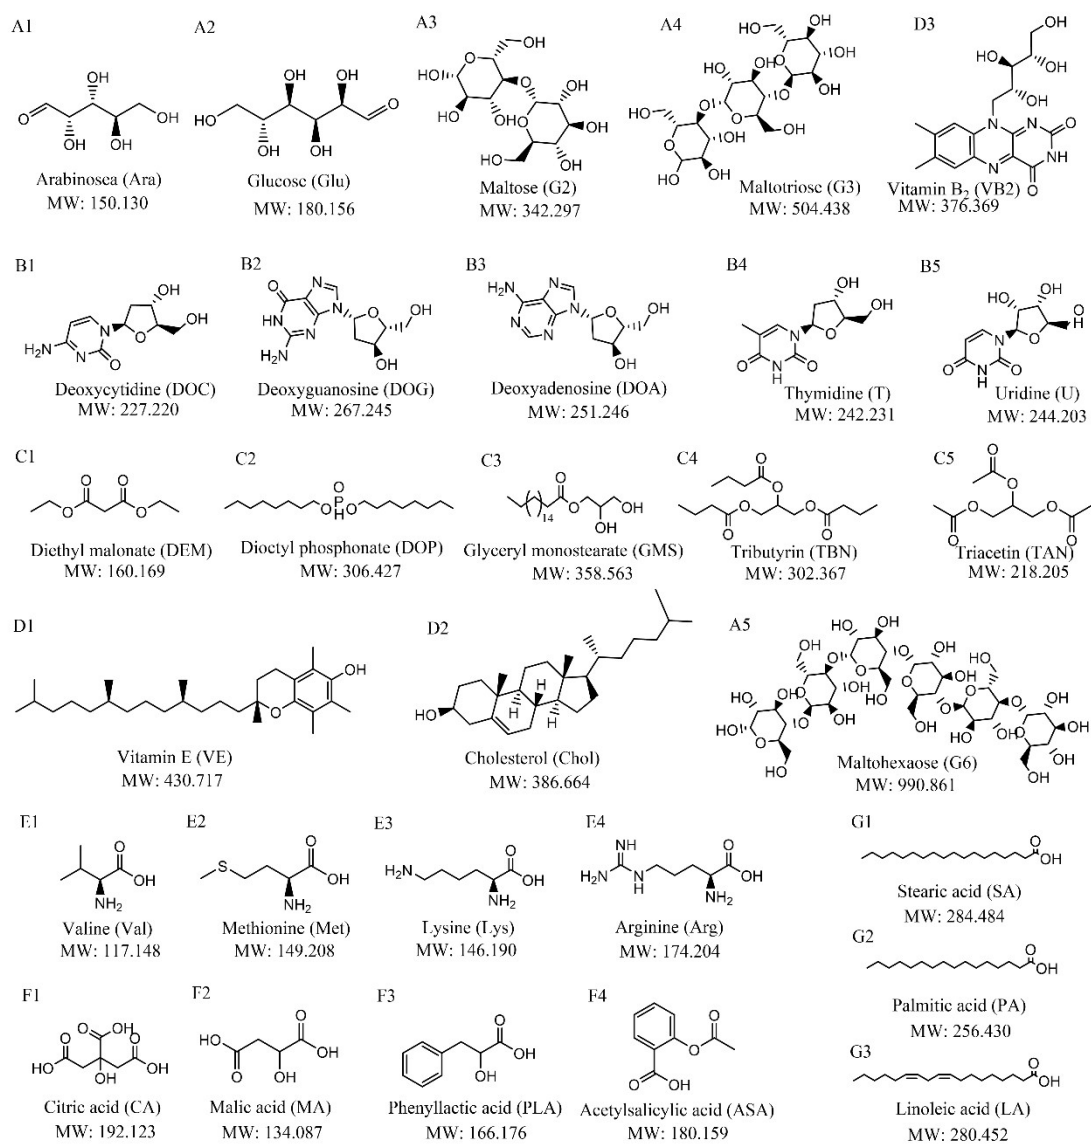

**Figure S1.** Chemical structures of detected small molecules classified by different capitals.

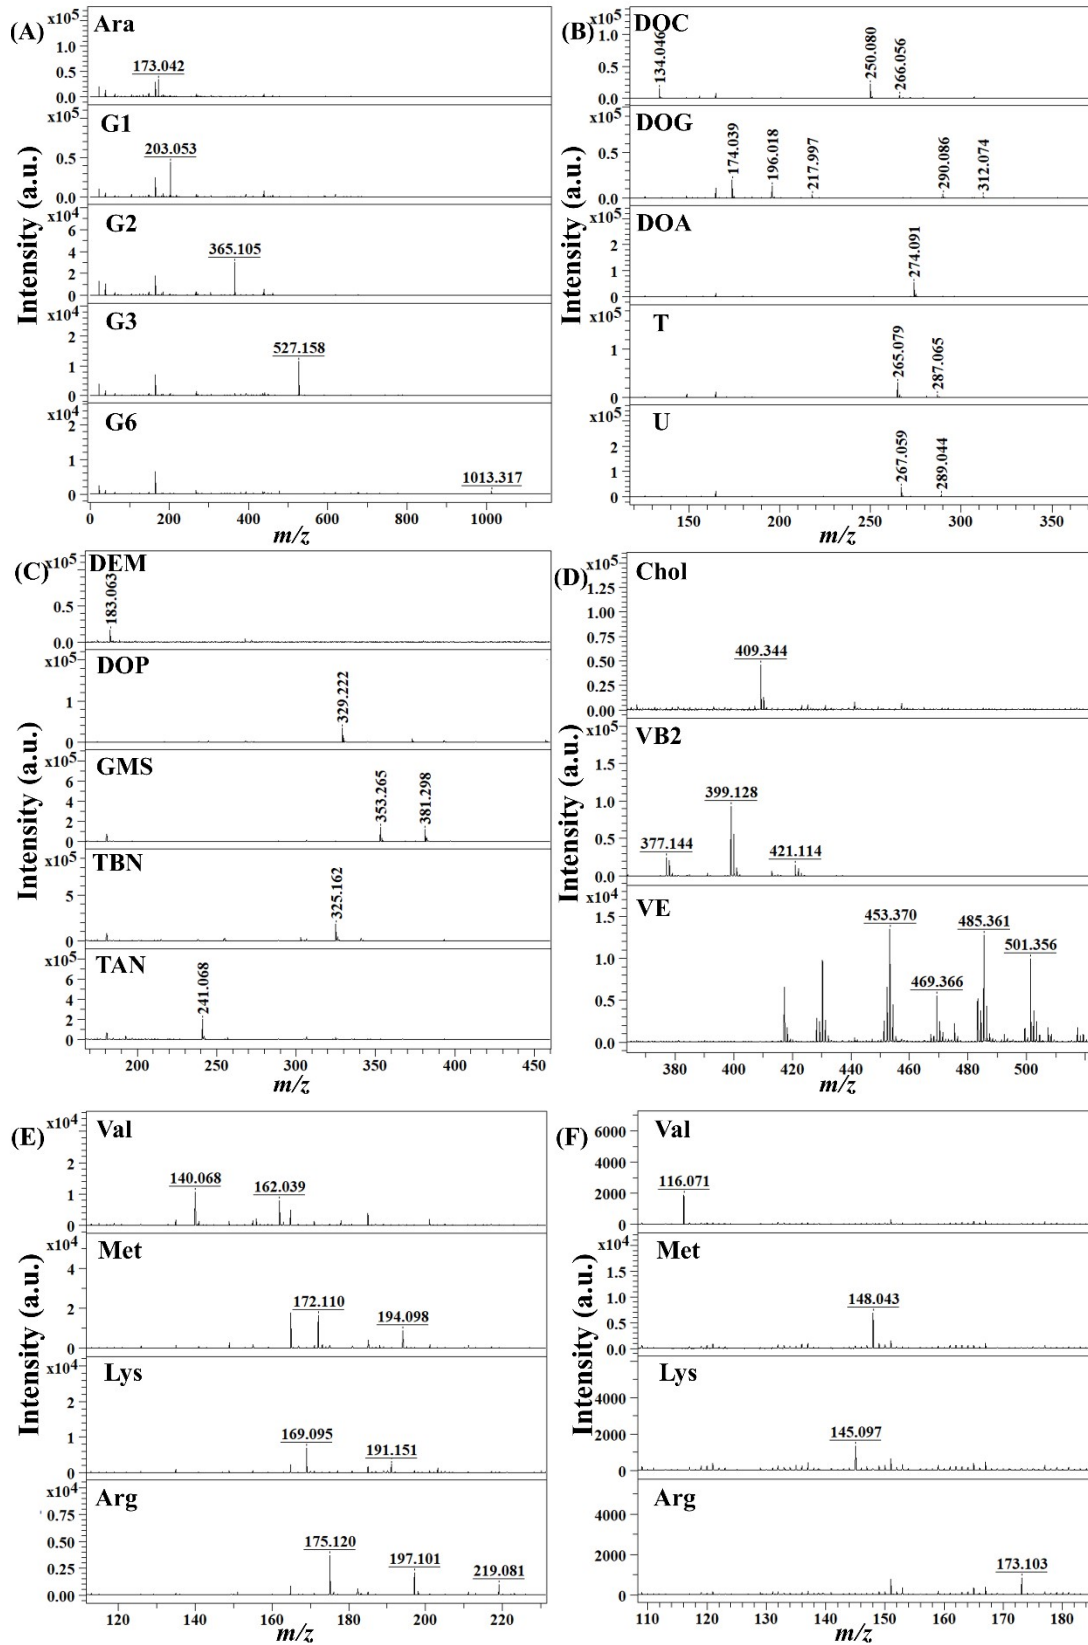

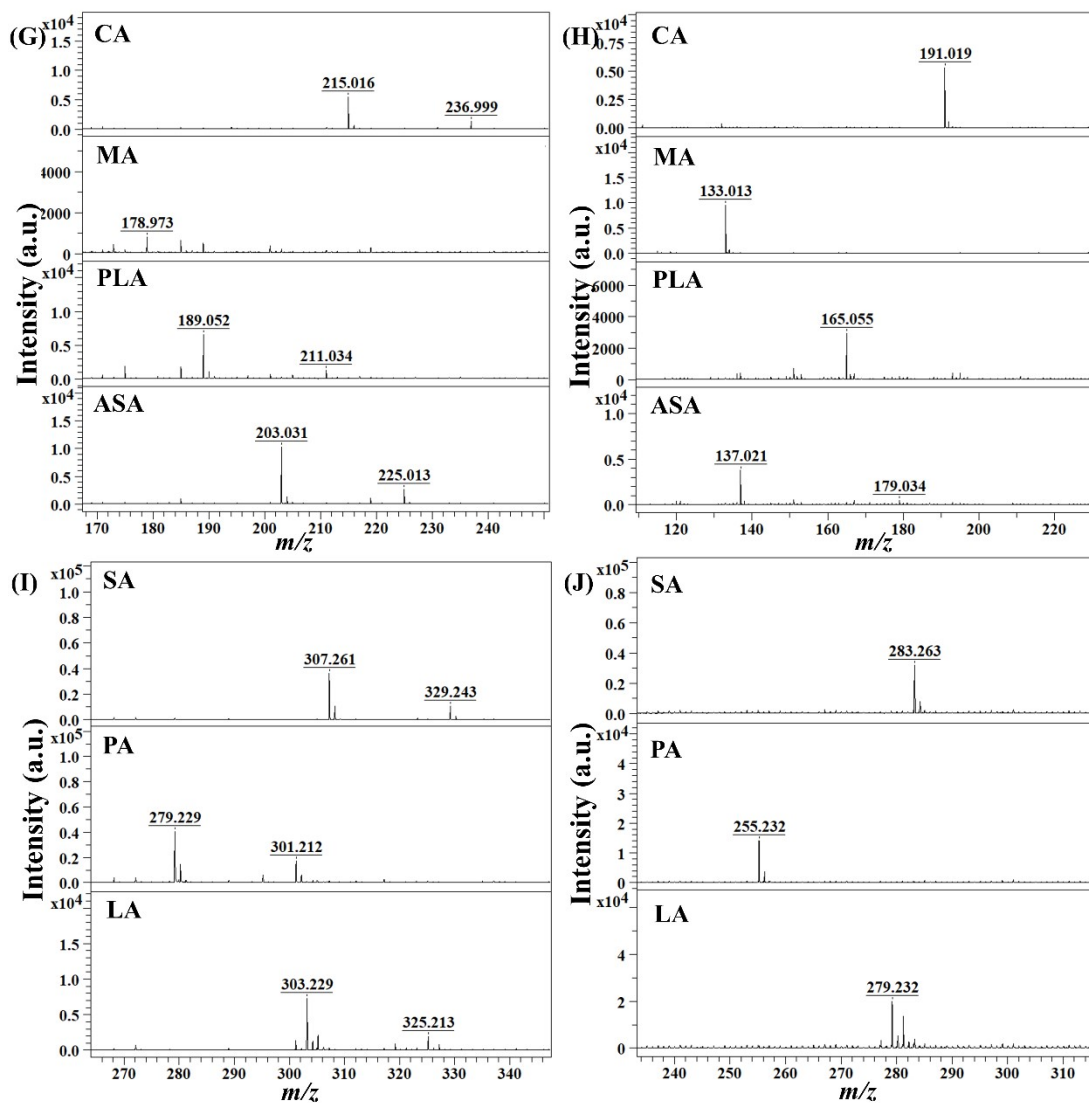

**Figure S2.** MALDI spectrum for qualitative results of oligosaccharides (A), glycosides(B), esters (C), vitamins (D), amino acids (E, F), hydroxy acids (G, H), and fatty acids (I, J) by DAL matrix in positive (A-D, E, G, I) and negative (F, H, J) modes.

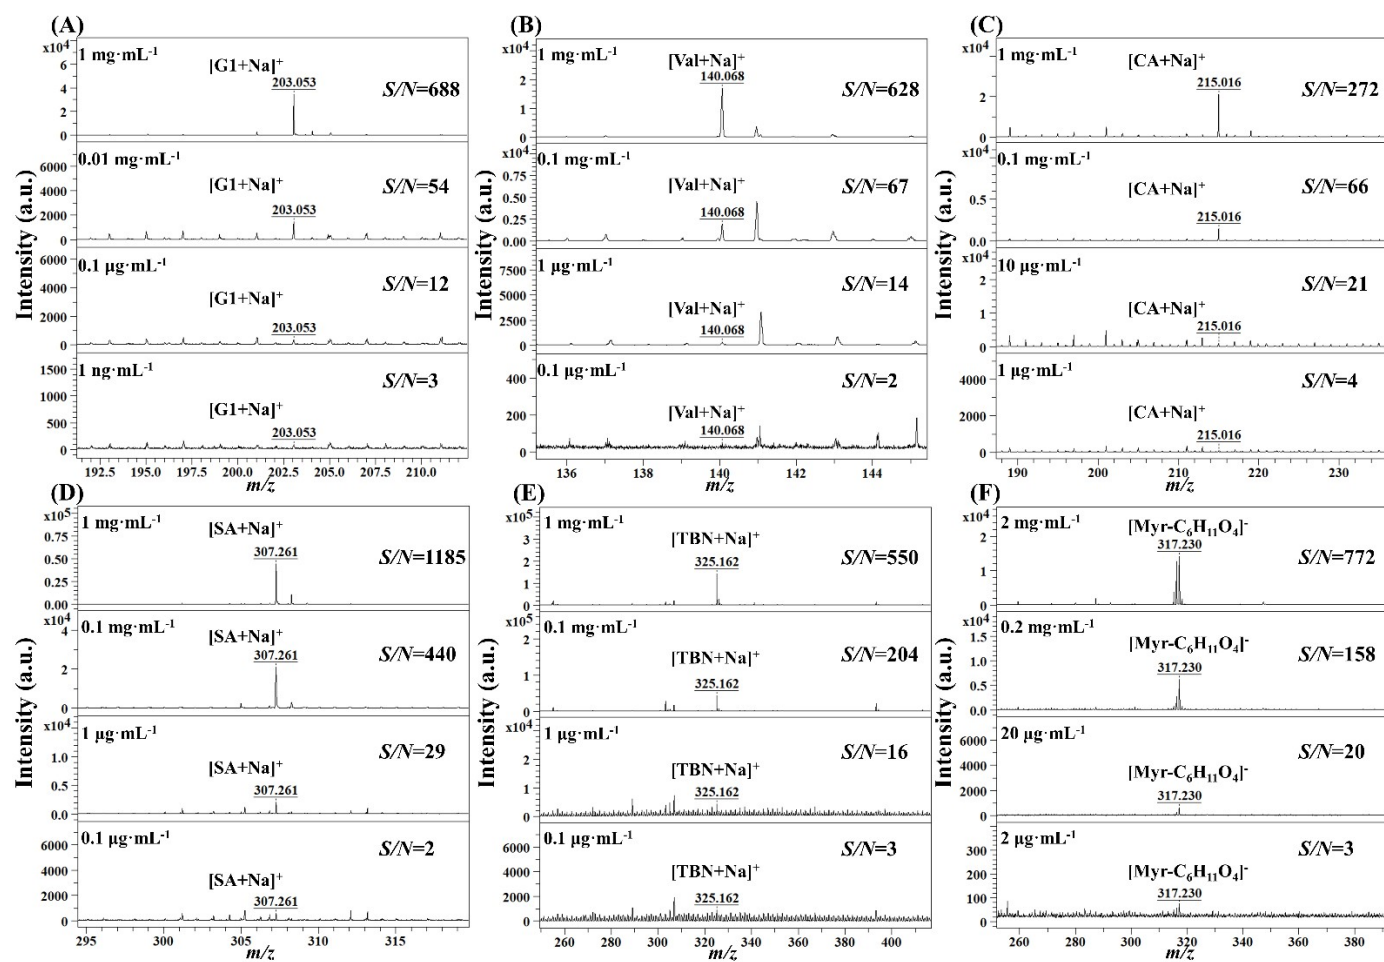

**Figure S3.** MALDI-TOF spectrums for different molecules with different concentrations, G1 (A), Val (B), CA (C), SA (D), and TBN (E) in positive mode, and Myr (F) in negative mode.

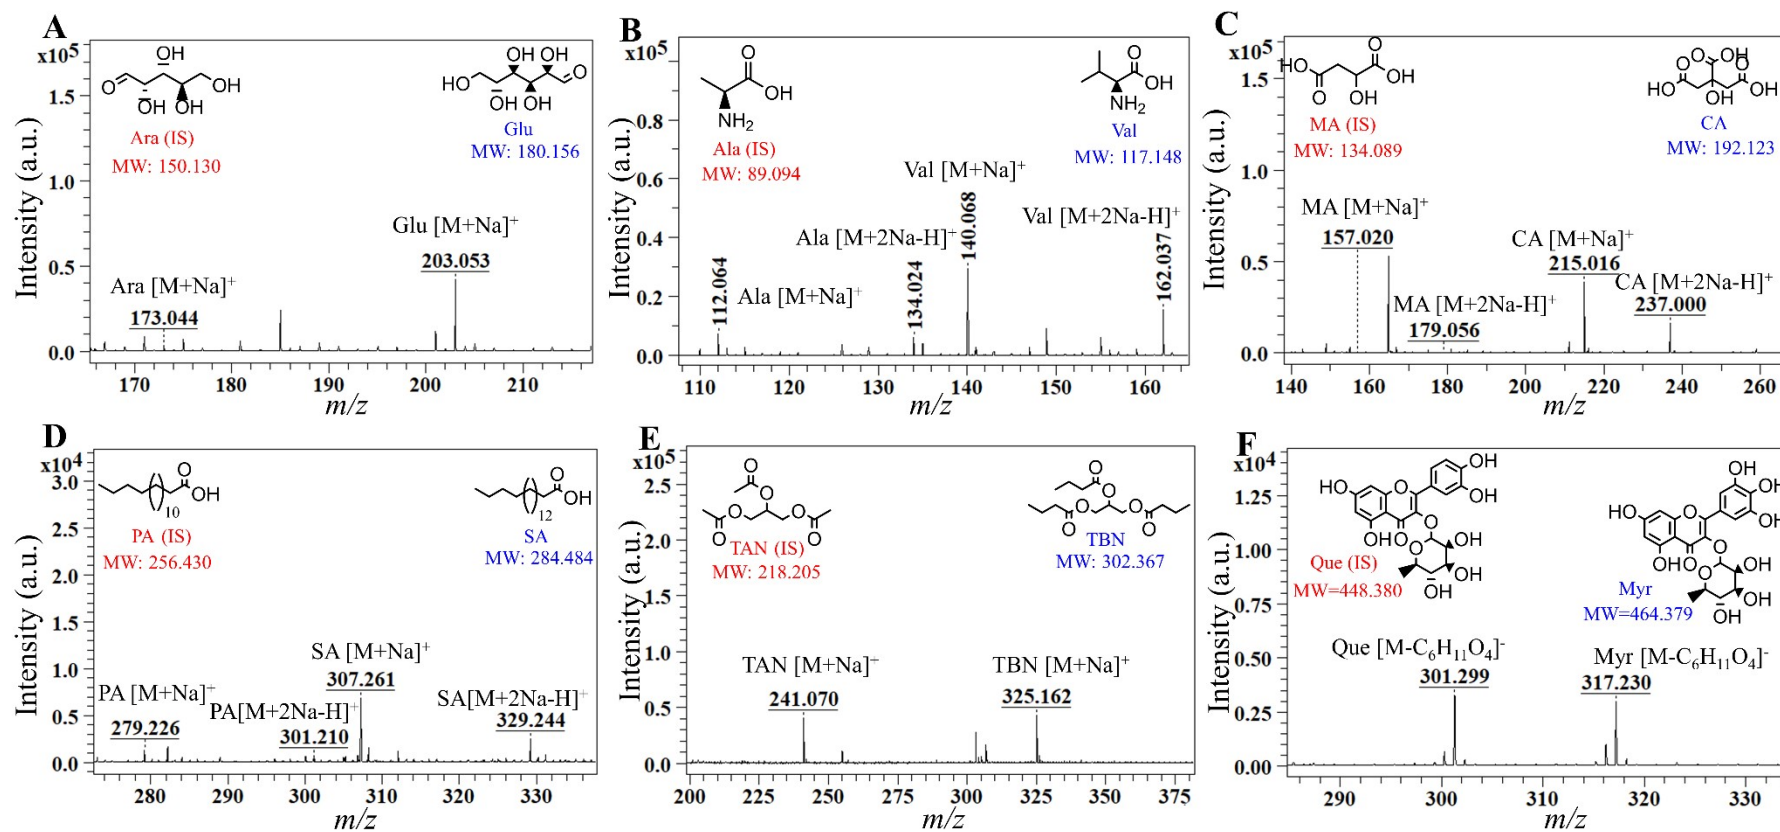

**Figure S4.** MALDI-TOF spectrums for different molecules spiked with their own IS, G1 (A), Val (B), CA (C), SA (D), and TBN (E) in positive mode, and Myr (F) in negative mode.

**Table.S1** Peak assignment of small molecules by MALDI using DAL as matrix.

| Mode        | Chemicals        | Peak Assignment                                            |                                                                                                                                                                               |                                                                                        |
|-------------|------------------|------------------------------------------------------------|-------------------------------------------------------------------------------------------------------------------------------------------------------------------------------|----------------------------------------------------------------------------------------|
| Positive    | Ara              | 173.042[M+Na] <sup>+</sup>                                 |                                                                                                                                                                               |                                                                                        |
|             | G1               | 203.053[M+Na] <sup>+</sup>                                 |                                                                                                                                                                               |                                                                                        |
|             | oligosaccharides | G2                                                         | 365.105[M+Na] <sup>+</sup>                                                                                                                                                    |                                                                                        |
|             |                  | G3                                                         | 527.158[M+Na] <sup>+</sup>                                                                                                                                                    |                                                                                        |
|             |                  | G6                                                         | 1013.317[M+Na] <sup>+</sup>                                                                                                                                                   |                                                                                        |
|             |                  | DOC                                                        | 134.046[Cytosine+Na] <sup>+</sup> , 250.080[M+Na] <sup>+</sup> , 266.056[M+2Na-H] <sup>+</sup>                                                                                |                                                                                        |
|             |                  | DOG                                                        | 174.039[Guanine+Na] <sup>+</sup> , 196.018[Guanine+2Na-H] <sup>+</sup> , 217.997[Guanine+3Na-2H] <sup>+</sup> ,<br>290.086[M+Na] <sup>+</sup> , 312.074[M+2Na-H] <sup>+</sup> |                                                                                        |
|             | glycosides       | DOA                                                        | 274.091[M+Na] <sup>+</sup>                                                                                                                                                    |                                                                                        |
|             |                  | T                                                          | 265.079[M+Na] <sup>+</sup> , 287.065[M+2Na-H] <sup>+</sup>                                                                                                                    |                                                                                        |
|             |                  | U                                                          | 267.059[M+Na] <sup>+</sup> , 289.044[M+2Na-H] <sup>+</sup>                                                                                                                    |                                                                                        |
|             |                  | DEM                                                        | 183.063[M+Na] <sup>+</sup>                                                                                                                                                    |                                                                                        |
|             |                  | DOP                                                        | 329.222[M+Na] <sup>+</sup>                                                                                                                                                    |                                                                                        |
|             | esters           | GMS                                                        | 381.298[M+Na] <sup>+</sup>                                                                                                                                                    |                                                                                        |
|             |                  | TBN                                                        | 325.162[M+Na] <sup>+</sup>                                                                                                                                                    |                                                                                        |
|             |                  | TAN                                                        | 241.068[M+Na] <sup>+</sup>                                                                                                                                                    |                                                                                        |
|             |                  | VE                                                         | 453.370[M+Na] <sup>+</sup> , 469.366[M+K] <sup>+</sup> , 485.361[M+2Na-H] <sup>+</sup> , 501.356[M+Na+K-H] <sup>+</sup>                                                       |                                                                                        |
|             |                  | Chol                                                       | 409.344[M+Na] <sup>+</sup>                                                                                                                                                    |                                                                                        |
|             | vitamins         | VB2                                                        | 377.144[M+H] <sup>+</sup> , 399.128[M+Na] <sup>+</sup> , 421.114[M+2Na-H] <sup>+</sup>                                                                                        |                                                                                        |
|             |                  | Val                                                        | 140.068[M+Na] <sup>+</sup> , 162.039[M+2Na-H] <sup>+</sup>                                                                                                                    |                                                                                        |
|             |                  | amino acids                                                | Met                                                                                                                                                                           | 172.040[M+Na] <sup>+</sup> , 194.020[M+2Na-H] <sup>+</sup>                             |
|             |                  |                                                            | Lys                                                                                                                                                                           | 169.095[M+Na] <sup>+</sup> , 191.151[M+2Na-H] <sup>+</sup>                             |
|             |                  |                                                            | Arg                                                                                                                                                                           | 175.120[M+H] <sup>+</sup> , 197.101[M+Na] <sup>+</sup> , 219.081[M+2Na-H] <sup>+</sup> |
|             |                  | amino acids                                                | CA                                                                                                                                                                            | 215.016[M+Na] <sup>+</sup> , 236.999[M+2Na-H] <sup>+</sup>                             |
| MA          |                  |                                                            | 157.011[M+Na] <sup>+</sup> , 178.973[M+2Na-H] <sup>+</sup>                                                                                                                    |                                                                                        |
| PLA         |                  |                                                            | 189.052[M+Na] <sup>+</sup> , 211.034[M+2Na-H] <sup>+</sup>                                                                                                                    |                                                                                        |
| fatty acids |                  | ASA                                                        | 203.031[M+Na] <sup>+</sup> , 225.013[M+2Na-H] <sup>+</sup>                                                                                                                    |                                                                                        |
|             |                  | SA                                                         | 307.261[M+Na] <sup>+</sup> , 329.243[M+2Na-H] <sup>+</sup>                                                                                                                    |                                                                                        |
|             | PA               | 279.229[M+Na] <sup>+</sup> , 301.212[M+2Na-H] <sup>+</sup> |                                                                                                                                                                               |                                                                                        |
|             | LA               | 303.229[M+Na] <sup>+</sup> , 325.213[M+2Na-H] <sup>+</sup> |                                                                                                                                                                               |                                                                                        |
|             | Negative         | Val                                                        | 116.071[M-H] <sup>-</sup>                                                                                                                                                     |                                                                                        |
| amino acids |                  | Met                                                        | 148.043[M-H] <sup>-</sup>                                                                                                                                                     |                                                                                        |
|             |                  | Lys                                                        | 145.097[M-H] <sup>-</sup>                                                                                                                                                     |                                                                                        |
|             |                  | Arg                                                        | 173.103[M-H] <sup>-</sup>                                                                                                                                                     |                                                                                        |
|             |                  | CA                                                         | 191.09[M-H] <sup>-</sup>                                                                                                                                                      |                                                                                        |
| amino acids |                  | MA                                                         | 133.013[M-H] <sup>-</sup>                                                                                                                                                     |                                                                                        |
|             |                  | PLA                                                        | 165.055[M-H] <sup>-</sup>                                                                                                                                                     |                                                                                        |
|             |                  | ASA                                                        | 137.021[M-C2H3O] <sup>-</sup> , 179.034[M-H] <sup>-</sup>                                                                                                                     |                                                                                        |
| fatty acids |                  | SA                                                         | 283.263[M-H] <sup>-</sup>                                                                                                                                                     |                                                                                        |
|             |                  | PA                                                         | 255.232[M-H] <sup>-</sup>                                                                                                                                                     |                                                                                        |
|             |                  | LA                                                         | 279.232[M-H] <sup>-</sup>                                                                                                                                                     |                                                                                        |



**Table S2.** Quantification results of Myr by HPLC and MALDI.

Note: The standard regression equations of HPLC and MALDI are  $y = 14680x + 117002$  and  $y = 4.8648x - 0.0359$ , respectively.

| Name     | Concentration by HPLC<br>/ (mg·mL <sup>-1</sup> ) | Concentration by MALD<br>/ (mg·mL <sup>-1</sup> ) | Absolute content by HPLC<br>/ (mg·g <sup>-1</sup> ) | Absolute content by MALDI<br>/ (mg·g <sup>-1</sup> ) |
|----------|---------------------------------------------------|---------------------------------------------------|-----------------------------------------------------|------------------------------------------------------|
| WM-L1    | 0.4334                                            | 0.4355                                            | 8.6689                                              | 8.7101                                               |
| WM-L2    | 0.3820                                            | 0.3821                                            | 7.6406                                              | 7.6426                                               |
| WM-L3    | 0.3876                                            | 0.3889                                            | 7.7512                                              | 7.7775                                               |
| WM-L4    | 0.3827                                            | 0.3679                                            | 7.6543                                              | 7.3570                                               |
| TZM-L1   | 0.6136                                            | 0.6185                                            | 12.2713                                             | 12.3698                                              |
| TZM-L2   | 0.6335                                            | 0.6286                                            | 12.6704                                             | 12.5710                                              |
| TZM-L3   | 0.6592                                            | 0.6634                                            | 13.1843                                             | 13.2680                                              |
| TZM-L4   | 0.6428                                            | 0.6463                                            | 12.8552                                             | 12.9257                                              |
| RSAHB-L1 | 0.5858                                            | 0.5913                                            | 11.7160                                             | 11.8268                                              |
| RSAHB-L2 | 0.6353                                            | 0.6276                                            | 12.7060                                             | 12.5516                                              |
| RSAHB-L3 | 0.6467                                            | 0.6482                                            | 12.9349                                             | 12.9638                                              |
| RSAHB-L4 | 0.5200                                            | 0.5126                                            | 10.4006                                             | 10.2520                                              |
| WM-S1    | 0.3862                                            | 0.3856                                            | 7.7236                                              | 7.7129                                               |
| WM-S2    | 0.3850                                            | 0.3851                                            | 7.6998                                              | 7.7021                                               |
| WM-S3    | 0.4164                                            | 0.4133                                            | 8.3278                                              | 8.2660                                               |
| WM-S4    | 0.4169                                            | 0.4203                                            | 8.3376                                              | 8.4061                                               |
| TZM-S1   | 0.2881                                            | 0.2875                                            | 5.7622                                              | 5.7505                                               |
| TZM-S2   | 0.2867                                            | 0.2834                                            | 5.7347                                              | 5.6680                                               |
| TZM-S3   | 0.3023                                            | 0.3018                                            | 6.0464                                              | 6.0360                                               |
| TZM-S4   | 0.3118                                            | 0.3166                                            | 6.2357                                              | 6.3330                                               |
| RSAHB-S1 | 0.4525                                            | 0.4362                                            | 9.0497                                              | 8.7231                                               |
| RSAHB-S2 | 0.4584                                            | 0.4593                                            | 9.1684                                              | 9.1854                                               |
| RSAHB-S3 | 0.5197                                            | 0.5217                                            | 10.3939                                             | 10.4347                                              |
| RSAHB-S4 | 0.5304                                            | 0.5322                                            | 10.6084                                             | 10.6444                                              |

**Abbreviations**

AL: Alkali lignin; Ala: L-alanine; Ara: L-arabinose; Arg: L-arginine; ASA: Acetylsalicylic acid; CA: Citric acid; Chol: Cholesterol; DAL: Dealkaline lignin;

DEM: Diethyl malonate; DOA: 2'-deoxyadenosine; DOC: 2'-deoxycytidine; DOG: 2'-deoxyguanosine; DOP: Dioctyl phosphonate; EV: Ethyl vanillin; G1: D-glucose; G2: Maltose; G3: Maltotriose; G6: Maltohexose; GMS: Glyceryl monostearate; LA: Linoleic acid; Lys: L-lysine; MA: DL-malic acid; Met: L-methionine; Myr: Myricitrin; PA: Palmitic acid; PLA: D-phenyllactic acid; Que: Quercitrin; RSAHB: 'Ruan Si An Hai Bian'; SA: Stearic acid; T: Thymidine; TAN: Triacetin; TBN: Tributyrin; TZM: 'Te Zao Mei'; U: Uridine; Val: L-valine; VB2: Riboflavin; VE: Vitamin-E; WM: 'Wu Mei'.
